# Supplementary material for: A Stacking Ensemble Learning Model for Monthly Rainfall Prediction in the Taihu Basin, China
Source: MDPI journal article supplement (doi:10.3390/w14030492), 2022-02-07
Supplement: s1 [file s1]

Article

# A stacking ensemble learning model for monthly rainfall prediction in the Taihu Basin, China

Jiayue Gu <sup>1</sup>, Shuguang Liu <sup>1,2,\*</sup>, Zhengzheng Zhou <sup>1,\*</sup>, Sergey R. Chalov <sup>3</sup> and Qi Zhuang <sup>1</sup>

<sup>1</sup> Department of Hydraulic Engineering, Tongji University, Shanghai 200092, China; 1910008@tongji.edu.cn (J.G.); 1932631@tongji.edu.cn (Q.Z.)

<sup>2</sup> Key Laboratory of Yangtze River Water Environment, Ministry of Education, Tongji University, Shanghai 200092, China

<sup>3</sup> Hydrology Department, Faculty of Geography, Lomonosov Moscow State University, Moscow 119991, Russia; srchalov@geogr.msu.ru

\* Correspondence: liusgliu@tongji.edu.cn (S.L.); 19058@tongji.edu.cn (Z.Z.)

## Supplementary Figures

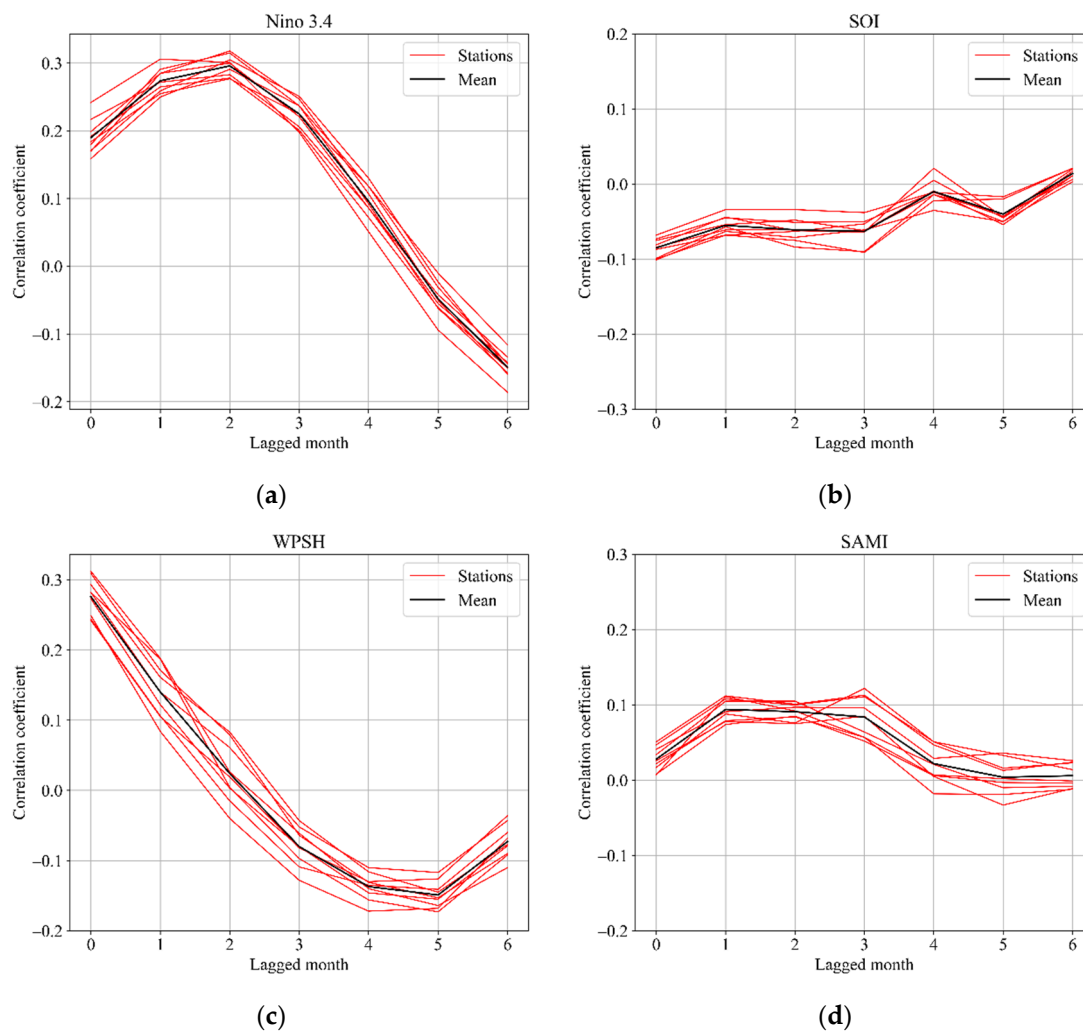

**Figure S1.** The correlation between lagged climate indices and rainfall at the 9 stations in the Taihu basin. Climate indices are: (a) Nino 3.4; (b) SOI; (c) WPSH; (d) SAMI.

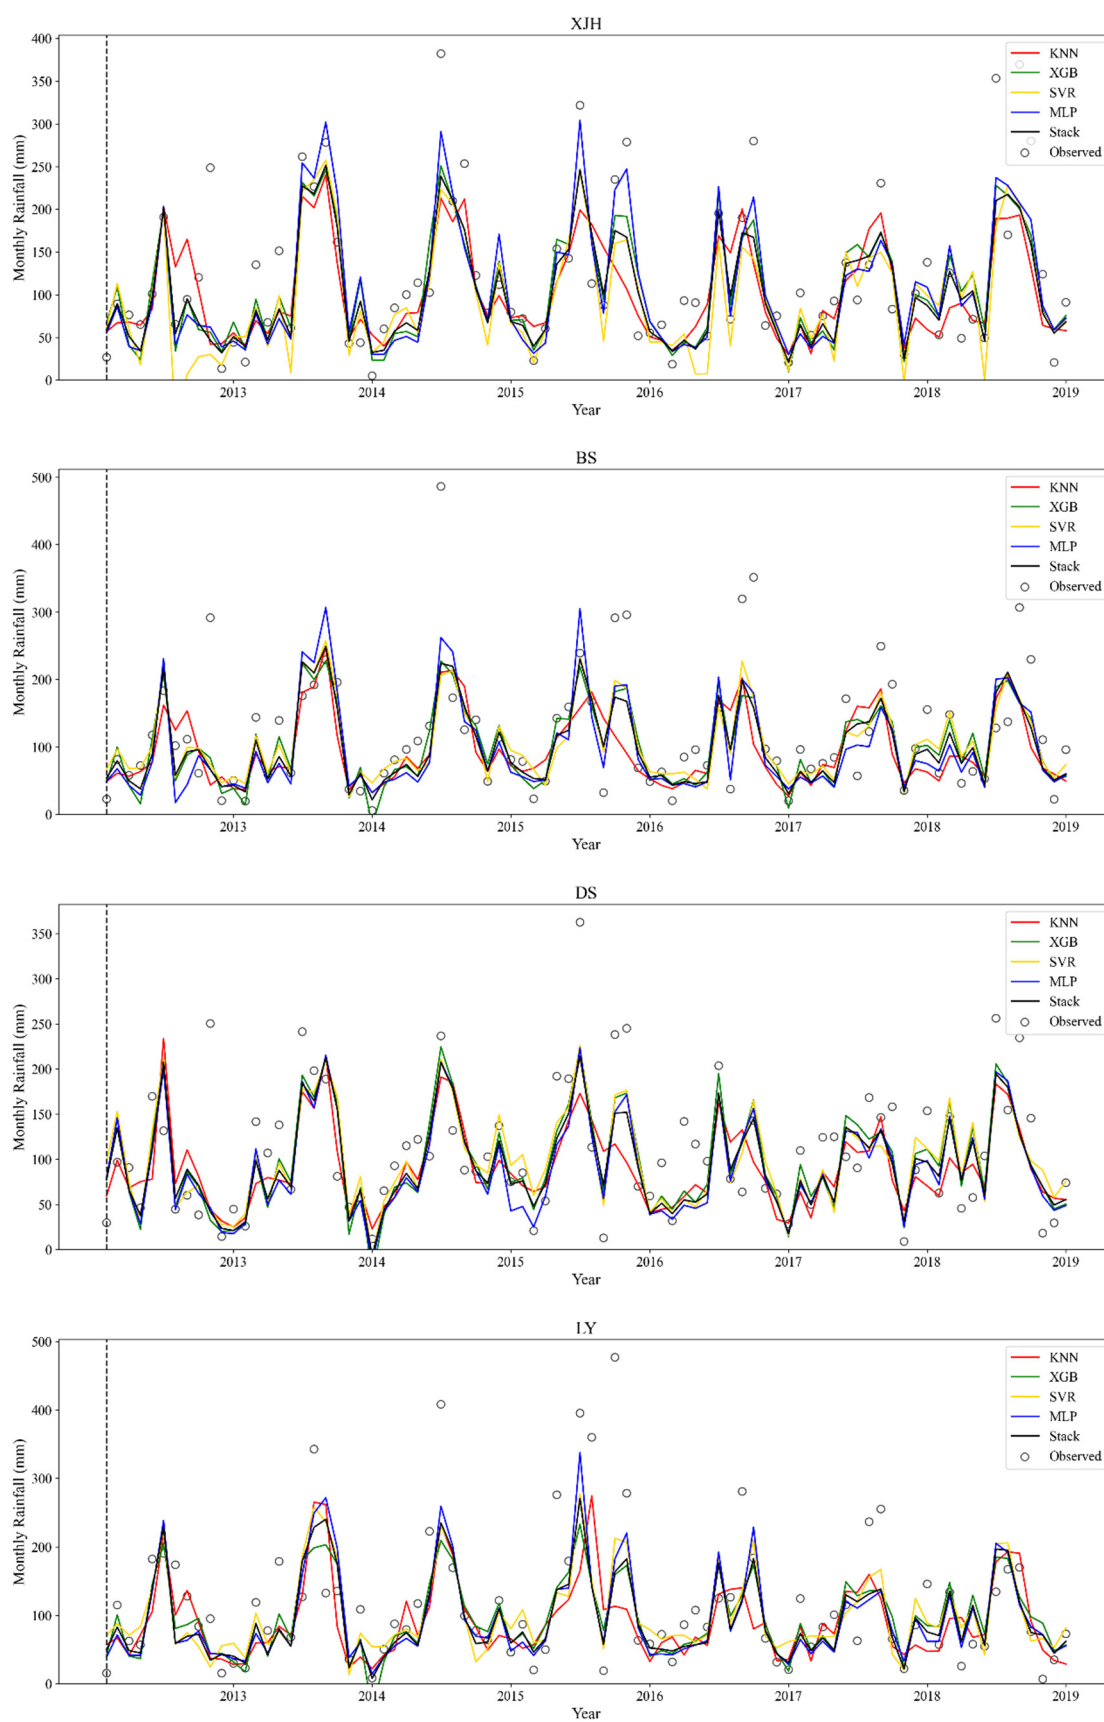

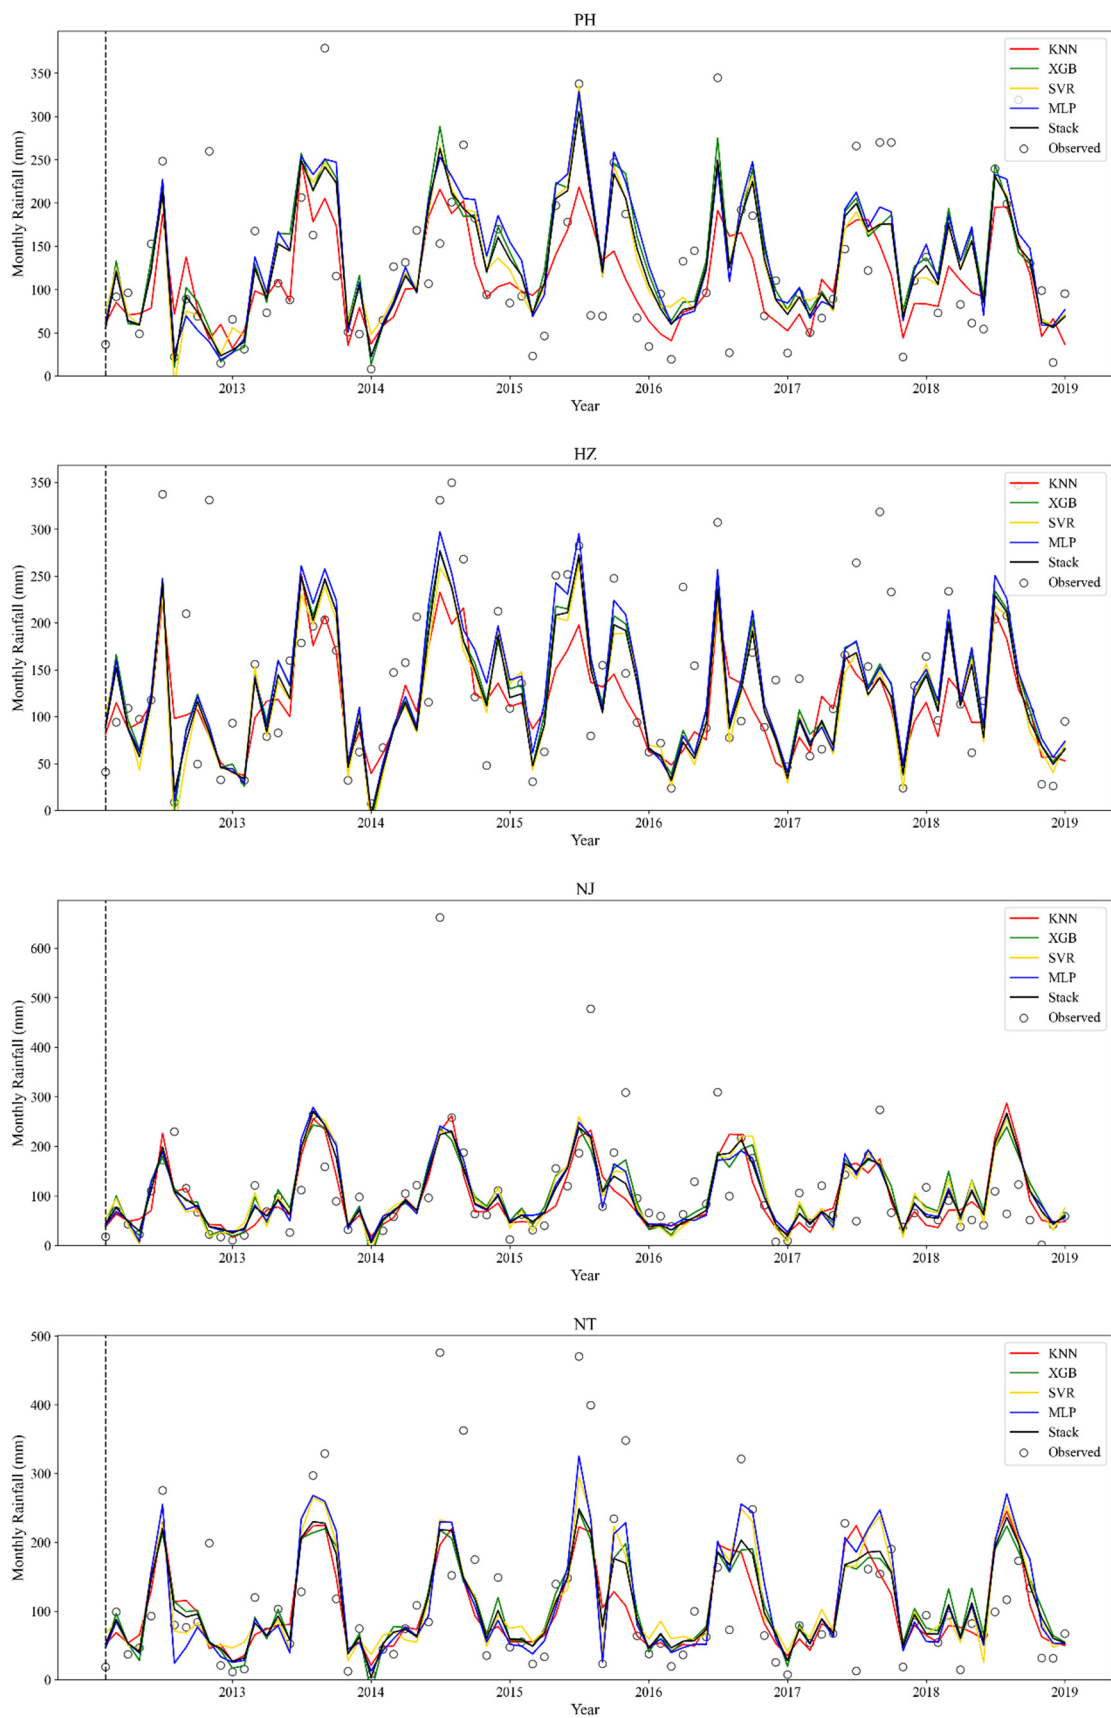

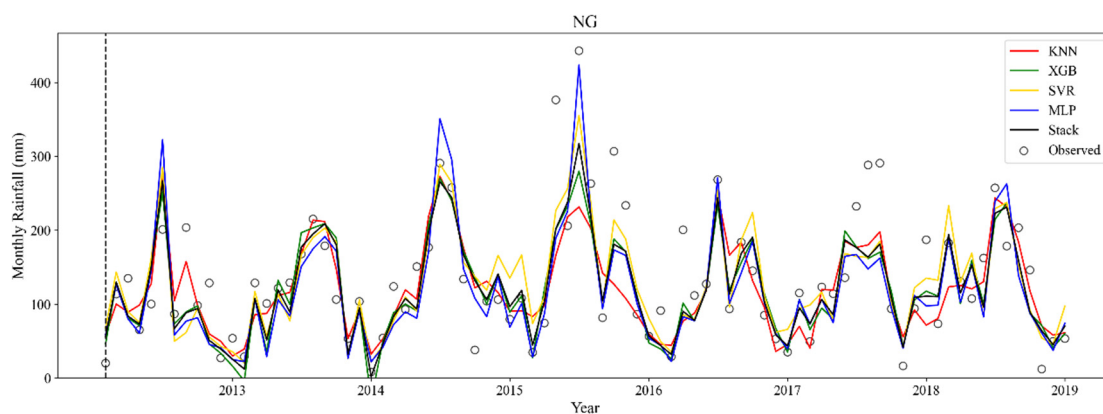

Figure S2. Prediction results of monthly rainfall at the nine stations in the Taihu basin.

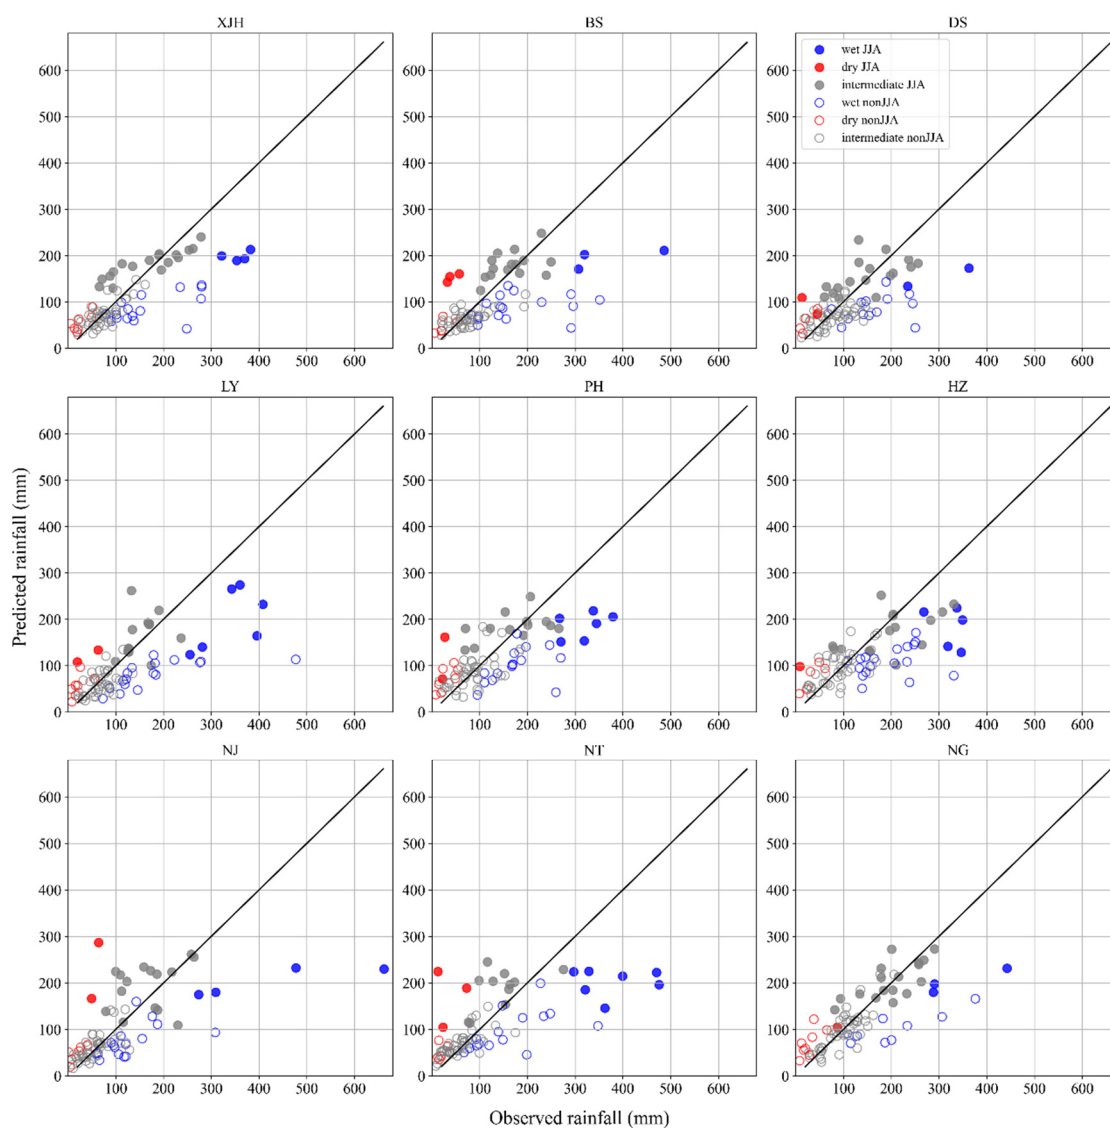

(a)

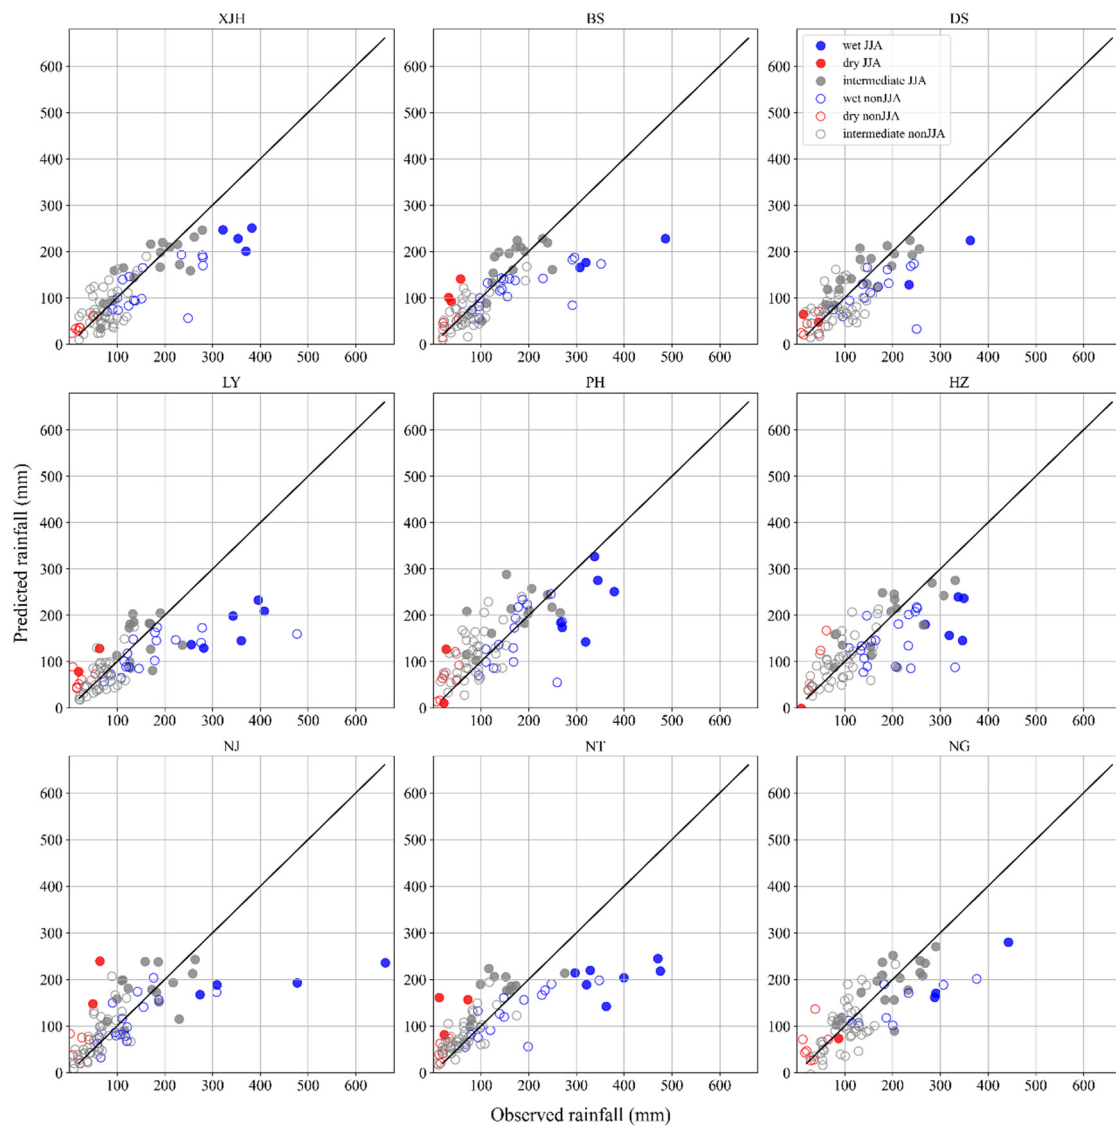

(b)

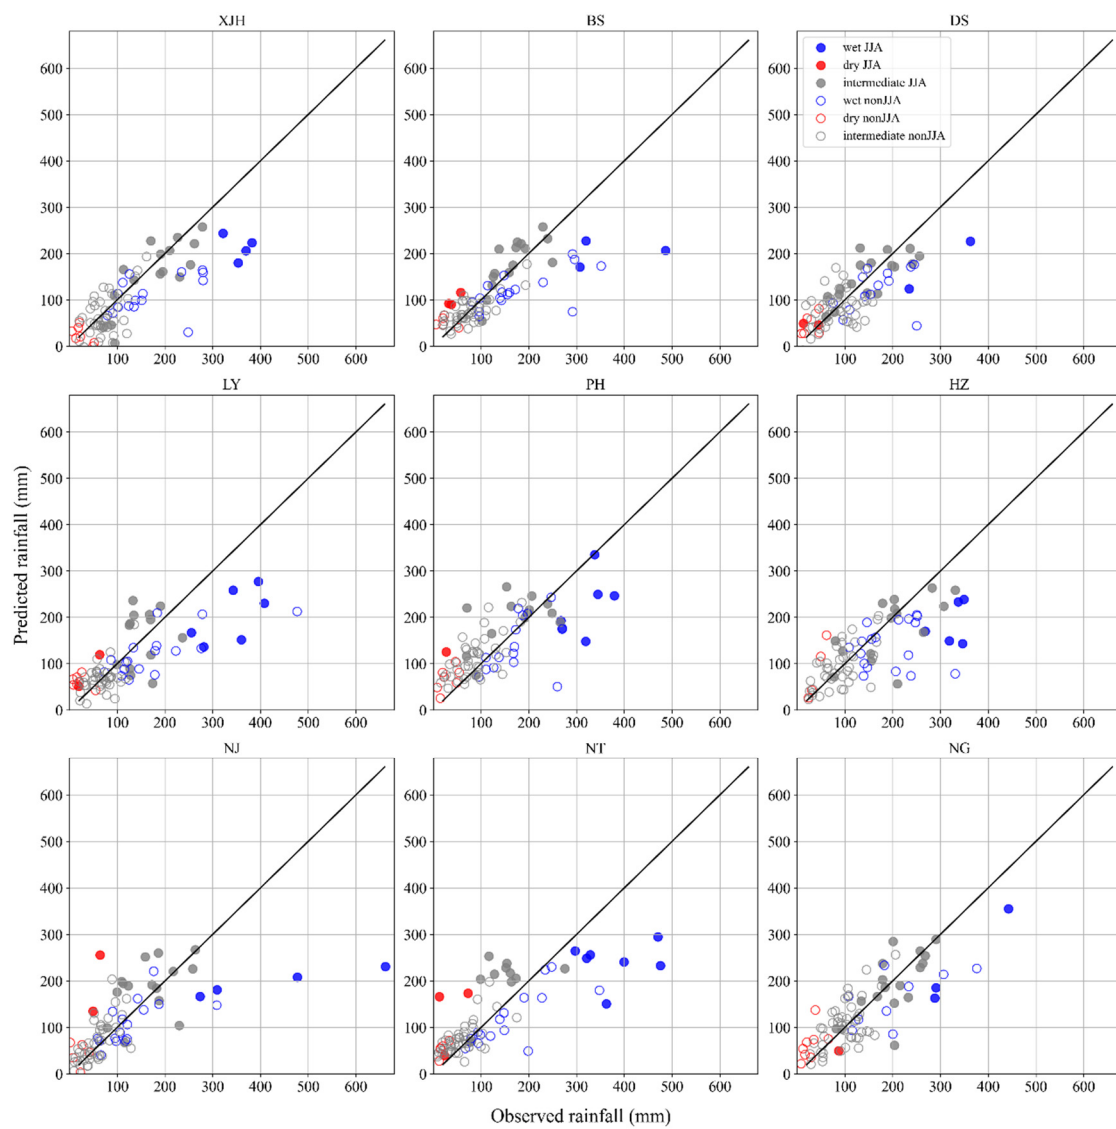

(c)

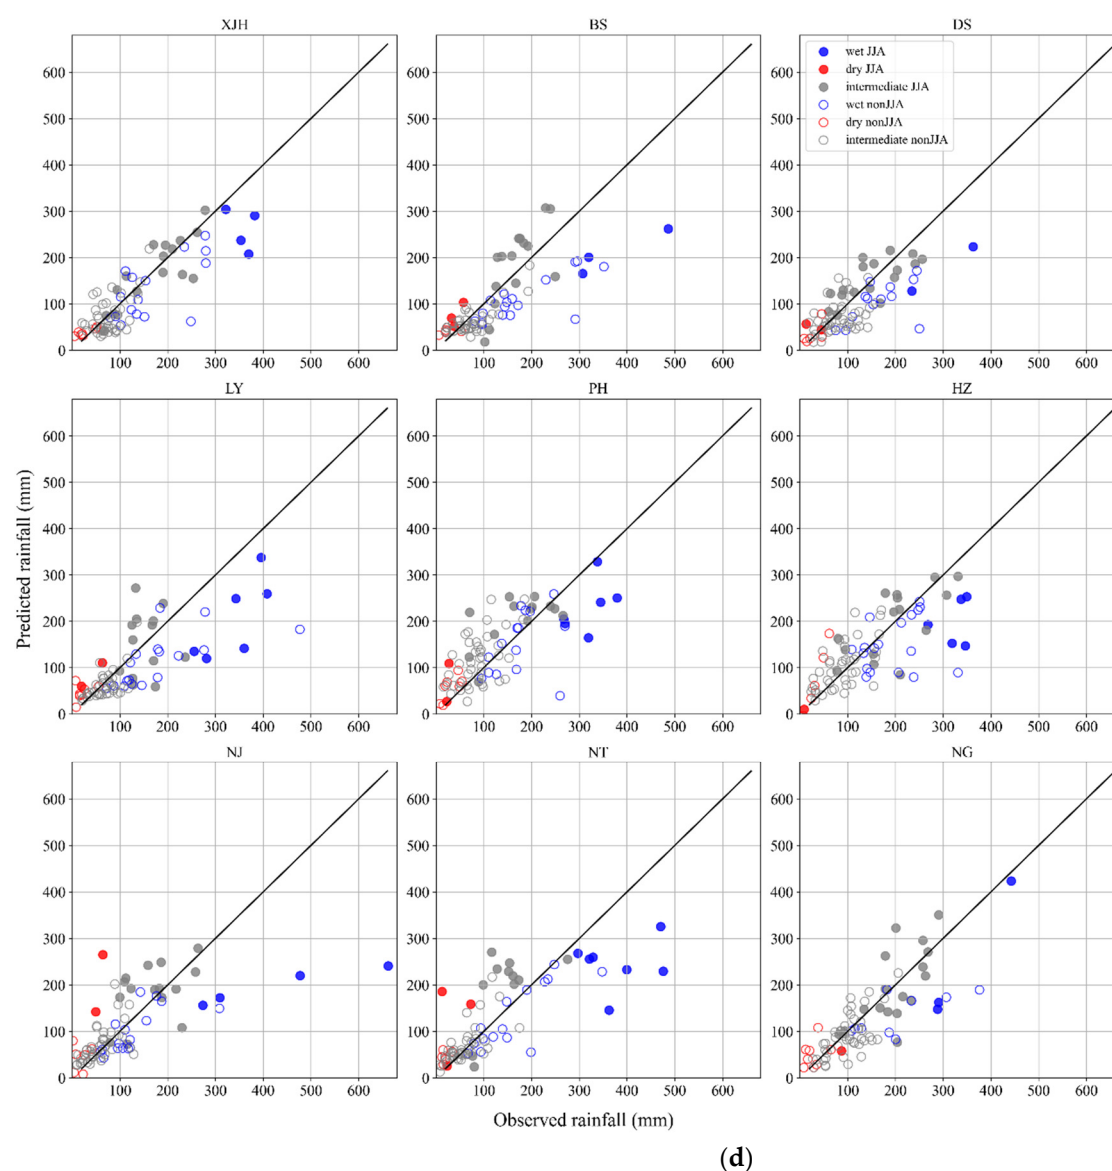

**Figure S3.** Scatter plot showing the association between observed and predicted rainfall of the base models for the testing period (2013-2019): (a) k-NN model; (b) XGB model; (c) SVR model; (d) ANN model.

**Table S1.** The best model selected in terms of  $R^2$ , RMSE and MAE at the nine stations.

|       | XJH | BS  | DS  | LY    | PH    | HZ    | NJ    | NT  | NG    |
|-------|-----|-----|-----|-------|-------|-------|-------|-----|-------|
| $R^2$ | ANN | SVR | XGB | SVR   | Stack | XGB   | XGB   | ANN | Stack |
| RMSE  | ANN | SVR | XGB | SVR   | Stack | XGB   | XGB   | ANN | Stack |
| MAE   | ANN | SVR | XGB | Stack | Stack | Stack | Stack | ANN | KNN   |

**Table S2.** The coefficient of variation deviation ( $C_v$ ) of the observed and the predicted monthly rainfall series at the nine stations.

|                         | XJH   | BS    | DS    | LY    | PH    | HZ    | NJ    | NT    | NG    |
|-------------------------|-------|-------|-------|-------|-------|-------|-------|-------|-------|
| Observation (1961-2012) | 0.820 | 0.837 | 0.781 | 0.809 | 0.800 | 0.723 | 0.944 | 0.890 | 0.737 |
| Observation (2013-2019) | 0.722 | 0.739 | 0.612 | 0.824 | 0.654 | 0.604 | 0.960 | 0.935 | 0.635 |
| KNN                     | 0.543 | 0.553 | 0.471 | 0.621 | 0.456 | 0.430 | 0.688 | 0.599 | 0.488 |
| XGB                     | 0.591 | 0.563 | 0.543 | 0.552 | 0.454 | 0.494 | 0.594 | 0.552 | 0.539 |
| SVR                     | 0.647 | 0.529 | 0.497 | 0.577 | 0.447 | 0.513 | 0.641 | 0.620 | 0.520 |



---

|       |       |       |       |       |       |       |       |       |       |
|-------|-------|-------|-------|-------|-------|-------|-------|-------|-------|
| ANN   | 0.664 | 0.677 | 0.571 | 0.680 | 0.458 | 0.507 | 0.633 | 0.691 | 0.627 |
| Stack | 0.587 | 0.569 | 0.512 | 0.605 | 0.448 | 0.509 | 0.623 | 0.570 | 0.523 |

---
